# Self-organized complexity in economics and finance

H. E. Stanley, L. A. N. Amaral, S. V. Buldyrev, <sup>+2</sup>, and M. A. Salinger [Authors Info & Affiliations](#)

February 19, 2002 | 99 (suppl\_1) 2561-2565 | <https://doi.org/10.1073/pnas.022582899>

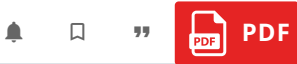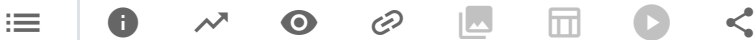

## Abstract

This article discusses some of the similarities between work being done by economists and by physicists seeking to contribute to economics. We also mention some of the differences in the approaches taken and seek to justify these different approaches by developing the argument that by approaching the same problem from different points of view, new results might emerge. In particular, we review two newly discovered scaling results that appear to be universal, in the sense that they hold for widely different economies as well as for different time periods: (*i*) the fluctuation of price changes of any stock market is characterized by a probability density function, which is a simple power law with exponent  $-4$  extending over  $10^2$  SDs (a factor of  $10^8$  on the  $y$  axis); this result is analogous to the Gutenberg–Richter power law describing the histogram of earthquakes of a given strength; and (*ii*) for a wide range of economic organizations, the histogram shows how size of organization is inversely correlated to fluctuations in size with an exponent  $\approx 0.2$ . Neither of these two new empirical laws has a firm theoretical foundation. We also discuss results that are reminiscent of phase transitions in spin systems, where the divergent behavior of the response function at the critical point (zero magnetic field) leads to large fluctuations.

## Continue Reading

[VIEW PDF](#)

[FULL TEXT](#)

## Acknowledgments

This work on which this invited talk is based is supported by the National Science Foundation and British Petroleum and was carried out in collaboration with D. Canning, A. Chessa, P. Cizeau, X. Gabaix, S. Goodwin, T. Guhr, S. Havlin, P. Ivanov, T. A. Keitt, Y. Lee, Y. Liu, P. Maass, R. N. Mantegna, M. Meyer, C.-K. Peng, B. Podobnik, B. Rosenow, and M. H. R. Stanley.

## References

1  
Stanley H. E., (1971) *Introduction to Phase Transitions and Critical Phenomena* (Oxford Univ. Press, Oxford).  
[Google Scholar](#)

2  
Mantegna R. N. & Stanley, H. E., (2000) *An Introduction to Econophysics: Correlations and Complexity in Finance* (Cambridge Univ. Press, Cambridge, U.K.).  
[Google Scholar](#)

SHOW ALL REFERENCES

[VIEW FULL TEXT](#) | [DOWNLOAD PDF](#)

## Further reading in this issue

INTRODUCTION | FEBRUARY 19, 2002 | 

### Self-organized complexity in the physical, biological, and social sciences

Donald L. Turcotte and John B. Rundle

RESEARCH ARTICLE | FEBRUARY 19, 2002 | 

### Fractal dynamics in physiology: Alterations with disease and aging

Ary L. Goldberger, Luis A. N. Amaral, [...] H. Eugene Stanley

RESEARCH ARTICLE | FEBRUARY 19, 2002 | 

### Allometric scaling of metabolic rate from molecules and mitochondria to cells and mammals

Geoffrey B. West, William H. Woodruff, and James H. Brown

## Trending

RESEARCH ARTICLE | NOVEMBER 17, 2025 | 

### Organic geochemical evidence for life in Archean rocks identified by pyrolysis–GC–MS and supervised machine learning

Teasing out biochemical information from ancient organic-rich sediments, notably the timing of the emergence of...

Michael L. Wong, Anirudh Prabhu, [...] Robert M. Hazen

BRIEF REPORT | NOVEMBER 17, 2025 | 

### Female fertility and infant survivorship increase following lethal intergroup aggression and territorial expansion in wild chimpanzees

Lethal coalitionary intergroup aggression is a conspicuous aspect of wild chimpanzee behavior. Evidence indicates that...

Brian M. Wood, David P. Watts, [...] John C. Mitani

RESEARCH ARTICLE | NOVEMBER 20, 2025 | 

### The potential existential threat of large language models to online survey research

Surveys are a primary source of data across the sciences, from medicine to economics. I demonstrate that the assumption tha...

Sean J. Westwood

# Sign up for the PNAS Highlights newsletter

Get in-depth science stories sent to your inbox twice a month.

name@example.com

SUBSCRIBE >

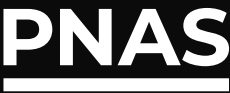

Proceedings of the  
National Academy of Sciences  
of the United States of America

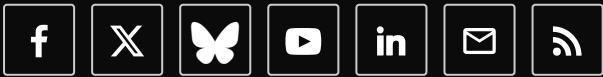

## BROWSE

CURRENT ISSUE

*PNAS NEXUS*

SPECIAL FEATURES

LIST OF ISSUES

TOPICS, COLLECTIONS, AND ARTICLE TYPES

PNAS IN THE NEWS

FRONT MATTER

JOURNAL CLUB

MULTIMEDIA

PODCASTS

## INFORMATION

ABOUT

SUSTAINABLE DEVELOPMENT GOALS

EDITORIAL BOARD

AUTHORS

REVIEWERS

SUBSCRIBERS

LIBRARIANS

PRESS

COZZARELLI PRIZE

PNAS UPDATES
