# Self-organized complexity in economics and finance

H. E. Stanley, L. A. N. Amaral, S. V. Buldyrev, <sup>+2</sup>, and M. A. Salinger [Authors Info & Affiliations](#)

February 19, 2002 | 99 (suppl\_1) 2561-2565 | <https://doi.org/10.1073/pnas.022582899>

   PDF/EPUB

## Abstract

This article discusses some of the similarities between work being done by economists and by physicists seeking to contribute to economics. We also mention some of the differences in the approaches taken and seek to justify these different approaches by developing the argument that by approaching the same problem from different points of view, new results might emerge. In particular, we review two newly discovered scaling results that appear to be universal, in the sense that they hold for widely different economies as well as for different time periods: (i) the fluctuation of price changes of any stock market is characterized by a probability density function, which is a simple power law with exponent  $-4$  extending over  $10^2$  SDs (a factor of  $10^8$  on the  $y$  axis); this result is analogous to the Gutenberg–Richter power law describing the histogram of earthquakes of a given strength; and (ii) for a wide range of economic organizations, the histogram shows how size of organization is inversely correlated to fluctuations in size with an exponent  $\approx 0.2$ . Neither of these two new empirical laws has a firm theoretical foundation. We also discuss results that are reminiscent of phase transitions in spin systems, where the divergent behavior of the response function at the critical point (zero magnetic field) leads to large fluctuations.

## Continue Reading

[VIEW PDF](#)[FULL TEXT](#)

## Acknowledgments

This work on which this invited talk is based is supported by the National Science Foundation and British Petroleum and was carried out in collaboration with D. Canning, A. Chessa, P. Cizeau, X. Gabaix, S. Goodwin, T. Guhr, S. Havlin, P. Ivanov, T. A. Keitt, Y. Lee, Y. Liu, P. Maass, R. N. Mantegna, M. Meyer, C.-K. Peng, B. Podobnik, B. Rosenow, and M. H. R. Stanley.

## References

- 1 Stanley H. E., (1971) *Introduction to Phase Transitions and Critical Phenomena* (Oxford Univ. Press, Oxford).

2 Mantegna R. N. & Stanley, H. E., (2000) *An Introduction to Econophysics: Correlations and Complexity in Finance* (Cambridge Univ. Press, Cambridge, U.K.).

[Google Scholar](#)

3 Bouchaud J. P. & Potters, M., (2000) *Theory of Financial Risk* (Cambridge Univ. Press, Cambridge, U.K.).

[Google Scholar](#)

[SHOW ALL REFERENCES](#)

[VIEW FULL TEXT](#) | [DOWNLOAD PDF](#)

## Further reading in this issue

INTRODUCTION | FEBRUARY 19, 2002 |

### Self-organized complexity in the physical, biological, and social sciences

Donald L. Turcotte and John B. Rundle

RESEARCH ARTICLE | FEBRUARY 19, 2002 |

### Fractal dynamics in physiology: Alterations with disease and aging

Ary L. Goldberger, Luis A. N. Amaral, [...] H. Eugene Stanley

RESEARCH ARTICLE | FEBRUARY 19, 2002 |

### Allometric scaling of metabolic rate from molecules and mitochondria to cells and mammals

Geoffrey B. West, William H. Woodruff, and James H. Brown

## Trending

RESEARCH ARTICLE | DECEMBER 30, 2013 |

### Bodily maps of emotions

Emotions coordinate our behavior and physiological states during survival-salient events and pleasurable interactions. Ev...  
Lauri Nummenmaa, Enrico Glerean, [...] Jari K. Hietanen

RESEARCH ARTICLE | OCTOBER 21, 2024 |

### Effect of a giant meteorite impact on Paleoproterozoic surface environments and life

Giant meteorite impacts during Earth's early history likely had significant effects on early life. We studied the effects on the...  
Nadja Drabon, Andrew H. Knoll, [...] David A. Mucciarone

RESEARCH ARTICLE | SEPTEMBER 16, 2024 |

### Physician-patient racial concordance and newborn mortality

An influential study suggests that Black newborns experience much lower mortality when attended by Black physicians after...  
George J. Borjas and Robert VerBruggen

# Sign up for the PNAS Highlights newsletter

Get in-depth science stories sent to your inbox twice a month.

*name@example.com*

SUBSCRIBE >

**PNAS** Proceedings of the  
National Academy of Sciences  
of the United States of America

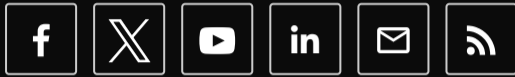

## BROWSE

CURRENT ISSUE

*PNAS NEXUS*

SPECIAL FEATURES

LIST OF ISSUES

COLLECTED PAPERS

PNAS IN THE NEWS

FRONT MATTER

JOURNAL CLUB

MULTIMEDIA

PODCASTS

## INFORMATION

ABOUT

DIVERSITY AND INCLUSION

EDITORIAL BOARD

AUTHORS

REVIEWERS

SUBSCRIBERS

LIBRARIANS

PRESS

COZZARELLI PRIZE

PNAS UPDATES
